1           **Phosphate is the third nutrient monitored by TOR in *Candida albicans* and**  
2           **provides a target for fungal-specific indirect TOR inhibition**

3

4                   Ning-Ning Liu<sup>1</sup>, Peter Flanagan<sup>2</sup>, Jumei Zeng<sup>1</sup>, Niketa Jani<sup>1</sup>,  
5                   Maria E. Cardenas<sup>3</sup>, Gary P. Moran<sup>2</sup>, Julia R. Köhler<sup>1,\*</sup>

6

7   **Affiliation:**

8   <sup>1</sup>Boston Children's Hospital and Harvard Medical School, <sup>2</sup>Division of Oral Biosciences,  
9    School of Dental Science, Trinity College Dublin, Ireland, <sup>3</sup>Department of Molecular  
10   Genetics and Microbiology, Duke University Medical Center, Durham, North Carolina.

11

12   \*Correspondence to: [julia.koehler@childrens.harvard.edu](mailto:julia.koehler@childrens.harvard.edu)

## 13 Abstract

14  
15 The TOR pathway regulates morphogenesis and responses to host cells in the fungal  
16 pathogen *Candida albicans*. Eukaryotic TOR complex 1 (TORC1) induces growth and  
17 proliferation in response to nitrogen and carbon source availability. Our unbiased  
18 genetic approach seeking new components of TORC1 signaling in *C. albicans* revealed  
19 that the phosphate transporter Pho84 is required for normal TORC1 activity. We found  
20 that mutants in *PHO84* are hypersensitive to rapamycin and, in response to phosphate  
21 feeding, generate less phosphorylated ribosomal protein S6 (P-S6) than wild type. The  
22 small GTPase Gtr1, a component of the TORC1-activating EGO complex, links Pho84  
23 to TORC1. Mutants in Gtr1, but not in another TORC1-activating GTPase, Rhb1, are  
24 defective in the P-S6 response to phosphate. Overexpression of Gtr1 and of a  
25 constitutively active Gtr1<sup>Q67L</sup> mutant suppress TORC1-related defects. In *S. cerevisiae*  
26 *pho84* mutants, constitutively active Gtr1 suppresses a TORC1 signaling defect but  
27 does not rescue rapamycin hypersensitivity. Hence connections from phosphate  
28 homeostasis to TORC1 may differ between *C. albicans* and *S. cerevisiae*. The converse  
29 direction of signaling, from TORC1 to the phosphate homeostasis (PHO) regulon,  
30 previously observed in *S. cerevisiae*, was genetically demonstrated in *C. albicans* using  
31 conditional *TOR1* alleles. A small molecule inhibitor of Pho84, an FDA-approved drug,  
32 inhibits TORC1 signaling and potentiates the activity of the antifungals amphotericin B  
33 and micafungin. Anabolic TORC1-dependent processes require significant amounts of  
34 phosphate. Our study demonstrates that phosphate availability is monitored and also  
35 controlled by TORC1, and that TORC1 can be indirectly targeted by inhibiting Pho84.

## 36 37 Significance

38  
39 The human fungal pathogen *Candida albicans* uses the TOR signaling pathway to  
40 contend with varying host environments and thereby regulate cell growth. Seeking novel  
41 components of the *C. albicans* TOR pathway we identified a cell-surface phosphate  
42 importer, Pho84, and its molecular link to TOR complex 1 (TORC1). Since phosphorus  
43 is a critical element for anabolic processes like DNA replication, ribosome biogenesis,  
44 translation and membrane biosynthesis, TORC1 monitors its availability in regulating  
45 these processes. By depleting the central kinase in the TORC1 pathway, we showed

46 that TORC1 signaling modulates regulation of phosphate acquisition. An FDA-approved  
47 small-molecule inhibitor of Pho84 inhibits TORC1 signaling and potentiates the activity  
48 of the gold-standard antifungal amphotericin B and the echinocandin micafungin.

## 49 50 **Introduction**

51  
52 Organisms that fail to maximize growth in response to abundant nutrients can be  
53 outcompeted by those that do. Conversely, organisms that fail to cease growth and  
54 induce survival programs during stress and starvation lose viability. The Target of  
55 Rapamycin (TOR) signaling pathway is conserved in eukaryotes and integrates multiple  
56 channels of information regarding the cells' nutritional and physical environment, to  
57 induce either growth and proliferation, or stress- and survival responses (1). In the  
58 human fungal pathogen *Candida albicans*, TOR participates in regulating  
59 morphogenesis (2-7) and responses to host cells (8). To control growth, *C. albicans*  
60 TOR also integrates signals of carbon source availability from the protein kinase A  
61 (PKA) pathway with nitrogen source status, its primary nutritional input (9). Similar TOR-  
62 PKA intersections have been reported in the model yeast *Saccharomyces cerevisiae*  
63 (10, 11).

64  
65 In *S. cerevisiae*, TOR complex 1 (TORC1), which is susceptible to inhibition by  
66 rapamycin, is activated by preferred nitrogen sources such as glutamine and leucine.  
67 Leucine activates TORC1 through the Exit from G0 (EGO) complex by inducing GTP  
68 loading of one of its subunits, the small GTPase Gtr1 (12). Leucine also promotes  
69 TORC1 activity through leucine-tRNA synthase Cdc60, which physically interacts with  
70 Gtr1 (13). Many transcriptional regulators responsive to *S. cerevisiae* and *C. albicans*  
71 TORC1 pathways are conserved (4), but there are important differences between these  
72 species as well.

73  
74 A small Ras-like GTPase upstream of TORC1, Rheb in mammals (14) and Rhb1 in *S.*  
75 *cerevisiae* (15), also responds to nutritional signals. Rheb is a central activator of  
76 mammalian TORC1 (mTORC1) and is modulated by the TSC1/TSC2 complex (16, 17),  
77 while in *S. cerevisiae*, Rhb1 seems to play a minor role in nutritional signaling. In *C.*  
78 *albicans*, Rhb1 is required for normal tolerance to rapamycin and for phosphorylation of  
79 ribosomal protein S6, a readout of TORC1 activation (9, 18). *C. albicans* Rhb1 co-

80 regulates expression of genes important in nitrogen source uptake (18) and in virulence  
81 (19). Unlike *S. cerevisiae*, *C. albicans* also has a TSC2 homolog whose mutant  
82 phenotypes are consistent with a conserved GTPase-activating activity of *C. albicans*  
83 Tsc2 for Rhb1 (18).

84

85 Given the differences between the *S. cerevisiae* and *C. albicans* TORC1 pathways, we  
86 employed a forward genetic approach to find new components of *C. albicans* TORC1  
87 signaling. Using our mariner transposon mutant collection (20), we isolated a rapamycin  
88 hypersensitive mutant in a *C. albicans* homolog of *PHO84*, the gene encoding the major  
89 *S. cerevisiae* high-affinity phosphate transporter.

90

91 Having identified a connection between *C. albicans* Pho84 and the *C. albicans* TOR  
92 pathway in a forward genetic screen, we characterized this link between phosphate  
93 homeostasis and the cell's central growth control module. We found that we can  
94 indirectly target *C. albicans* TORC1, using small-molecule Pho84 inhibitors one of which  
95 is an FDA-approved antiviral drug, and that the antifungals amphotericin B and  
96 micafungin are potentiated by Pho84 inhibitors.

97

## 98 **Results**

99

100 **A screen of haploinsufficient transposon mutants for altered rapamycin**  
101 **susceptibility identified a *PHO84* ortholog.** We screened our heterozygous mutant  
102 collection of mariner-transposon insertions marked with our dominant selectable marker  
103 *NAT1* (20, 21) for altered rapamycin susceptibility. We isolated a transposon mutant  
104 hypersensitive to rapamycin in which the transposon disrupts the promoter of orf19.655,  
105 67 bp upstream of the predicted translational start site (Fig. S1A). This orf encodes a  
106 protein with 66% amino acid identity to *S. cerevisiae* Pho84 and 55% amino acid  
107 homology to the *Piriformospora indica* PiPT phosphate transporter whose crystal  
108 structure was recently described (22) (Fig. S1B). According to Candida Genome  
109 Database (CGD) nomenclature, we called this orf *C. albicans* *PHO84*, and used the  
110 CGD sequence for further analysis (23). To confirm that rapamycin hypersensitivity of  
111 the transposon mutant was linked to the disrupted *PHO84* locus, two independent  
112 heterozygous deletion mutants and their homozygous null derivatives were constructed.

113 Mutant phenotypes in these two lineages were the same, and one was chosen for  
114 further characterization (Fig. S1C). These mutants were also rapamycin hypersensitive  
115 (Fig. 1A), confirming that *PHO84* is required for normal tolerance of rapamycin.

116  
117 The cytoplasmic membrane protein Pho84 is the major high-affinity phosphate (Pi)  
118 transporter in *S. cerevisiae* (24-26). *PHO84* expression is controlled by the PHO  
119 regulon, a homeostatic system that maintains Pi availability for metabolism and growth  
120 in fluctuating external Pi conditions (27). *C. albicans pho84* mutants, like those in the *S.*  
121 *cerevisiae* homolog (28), failed to grow on medium without inorganic phosphate (Fig.  
122 1B). Heterozygous and re-integrant cells, apparently haploinsufficient for rapamycin  
123 tolerance (Fig. 1A), grew robustly on this medium (Fig. 1B), indicating that mechanisms  
124 other than haploinsufficiency affect growth during Pi depletion, like the feedback loops  
125 between expression of high- and low-affinity Pi transporters characterized in detail in the  
126 *S. cerevisiae* PHO regulon (28). In liquid media with 1 mM Pi, growth of *pho84* cells was  
127 close to wild type (Fig S1D). Expression of the *C. albicans PHO84* homolog restored  
128 growth on medium lacking Pi to *S. cerevisiae pho84* mutants (Fig. S1E), indicating  
129 functional orthology. Wild type cells secrete acid phosphatase in response to low  
130 ambient Pi to mobilize covalently bound Pi from their environment, and this response  
131 was used for decades in studies of the *S. cerevisiae* PHO regulon (29). *C. albicans*  
132 *pho84*<sup>-/-</sup> mutants, like those in *S. cerevisiae* (24), inappropriately de-repressed acid  
133 phosphatase secretion in high ambient Pi (Fig. S1F), consistent with a conserved role of  
134 *C. albicans* Pho84 in the PHO regulon.

135  
136 ***C. albicans* Pho84 is required for the normal TORC1 response to Pi availability.**

137 We then examined the relationship between Pho84 and TORC1. To test whether  
138 rapamycin hypersensitivity is due to decreased TORC1 kinase activity in the *pho84*<sup>-/-</sup>  
139 mutant, we monitored the phosphorylation state of ribosomal protein S6 (P-S6), which  
140 we previously showed is controlled by TORC1 signaling (9). Null mutants in *PHO84* had  
141 a weaker P-S6 signal than wild type during Pi refeeding at every Pi concentration of the  
142 media, though they responded to increasing Pi concentrations with an increasing P-S6  
143 signal (Fig. 1C). Pho84 therefore is required for normal anabolic TORC1 signaling, and  
144 TORC1 activity responds to ambient Pi availability.

145

146 **Heterozygous and homozygous deletion mutants in *PHO84* are defective in**  
147 **hyphal morphogenesis.** TORC1 regulates hyphal morphogenesis in *C. albicans* (2-7,  
148 30), an important virulence determinant. Hyphal morphogenesis was defective in *pho84*  
149 mutants on YPD agar medium containing 10% serum, Spider medium and RPMI 1640  
150 (Figs. 1D and S2A), while equal growth of mutant and wild type was seen in these  
151 media when the temperature signal for hyphal morphogenesis was absent (Fig. S2B).  
152 While many signaling pathways converge on morphogenesis, these findings are  
153 formally consistent with defective regulation by TORC1 (2).

154  
155 **Pi content of cells lacking Pho84 is diminished.** We asked if *C. albicans* TORC1  
156 activity may be downregulated in response to decreased intracellular Pi in *pho84*  
157 mutants, analogously to the response of *S. cerevisiae* TORC1 to decreased intracellular  
158 amino acids. Using *pho85* mutants as controls known to hyperaccumulate intracellular  
159 Pi (31), we found that intracellular Pi concentrations were lower in *pho84*<sup>-/-</sup> null than in  
160 wild type cells in low and high Pi-containing media, though the difference was  
161 substantially less than in the homologous *S. cerevisiae* mutant-wild type pair (Fig. 1E).  
162 Diminished intracellular Pi concentrations of *C. albicans pho84*<sup>-/-</sup> cells may be  
163 responsible for, or contribute to the decreased TORC1 activation state, possibly in  
164 addition to lack of a putative TORC1-activating function performed specifically by Pho84.

165  
166 **Gtr1 links Pho84 to TORC1 in *C. albicans*.** Seeking a molecular link between Pho84  
167 and TORC1 activity, we considered the possibility that Gtr1 may connect Pho84 to  
168 TORC1. *GTR1* was first described for its functional and physical proximity to *S.*  
169 *cerevisiae PHO84* (32, 33), and its product later was characterized as a component of  
170 the TORC1-activating EGO complex (12, 13, 34, 35). We found that the P-S6 response  
171 of *gtr1*<sup>-/-</sup> cells to phosphate refeeding was blunted (Fig. 2A). To determine whether this  
172 is an unspecific effect of decreased upstream TORC1 signaling, mutants in another  
173 small TORC1-activating GTPase, *RHB1*, were tested. The *rhb1* mutants responded to  
174 Pi refeeding like the wild type (Fig. 2B), suggesting that a Pi signal to TORC1 is  
175 transmitted specifically through Gtr1.

176  
177 If Gtr1 acts downstream of Pho84 in activating TORC1, its overexpression may  
178 suppress *pho84*<sup>-/-</sup> phenotypes. *GTR1* was overexpressed from the *ACT1* promoter in

179 wild type and *pho84*<sup>-/-</sup> *C. albicans* cells. Compared with rapamycin hypersensitive  
180 *pho84*<sup>-/-</sup> cells transformed with the empty vector, the resulting *pho84*<sup>-/-</sup> *pACT1-GTR1*  
181 cells showed wild type tolerance to rapamycin, suggesting recovery of their TORC1  
182 signaling activity (Fig. 2C, D). To investigate this possibility TORC1 activity was tested  
183 directly by comparing the P-S6 signal of *pho84*<sup>-/-</sup> cells transformed with the empty  
184 vector with that of *pho84*<sup>-/-</sup> *pACT1-GTR1* cells. Overexpression of *GTR1* recovered  
185 Rps6 phosphorylation in *pho84*<sup>-/-</sup> cells nearly to wild type levels (Fig. 2E). A *GTR1*  
186 mutant encoding constitutively GTP-bound Gtr1<sup>Q67L</sup>, homologous to *S. cerevisiae*  
187 Gtr1<sup>Q65L</sup> (12, 35, 36), was then constructed and overexpressed from the *ACT1* promoter.  
188 This *GTR1*-GTP allele suppressed the TORC1 signaling defect of *pho84*<sup>-/-</sup> cells  
189 apparently equally to the overexpressed wild type *GTR1* (Fig. 2D, E). Overexpression of  
190 *GTR1* or *GTR1*-GTP did not increase phosphorylation of S6 in wild type cells (Fig. 2E).  
191 These findings are consistent with the model that in *C. albicans*, Gtr1 indirectly or  
192 directly conveys a Pi signal to TORC1 and links Pho84 to TORC1 signaling.

193  
194 We examined the relationship of Pho84 to TORC1 activity in the model yeast *S.*  
195 *cerevisiae*. A *pho84* null mutant in the S288C genetic background (37) was  
196 hypersensitive to rapamycin (Fig. S3A) at an intermediate ambient Pi concentration  
197 (1mM). Of note the rapamycin phenotype was highly responsive to the Pi concentration  
198 of pregrowth media. Rapamycin tolerance was not decreased by loss of *PHO84* in the  
199  $\Sigma$ 1278b background (not shown). Rapamycin hypersensitivity was not suppressed, but  
200 the *S. cerevisiae* Sch9 phosphorylation state (36) (Fig. S3B) and P-S6 signal intensity,  
201 which in *S. cerevisiae* also responds to TORC1 activation (Figs. 3 and S3C), were  
202 recovered by constitutively active Gtr1 in *pho84* null cells. These findings suggest that  
203 Pi homeostasis and TOR signaling are linked in *S. cerevisiae* as in *C. albicans*, though  
204 specific molecular connections seem to have divergently evolved in these two fungi.

205  
206 **TORC1 modulates the PHO regulon.** As TORC1 not only responds to nutrient  
207 availability, but also directs nutrient uptake e.g. by regulating expression of amino acid  
208 and ammonium transporters, we questioned whether it may play a similar role in  
209 phosphate acquisition. Given known discrepancies between rapamycin exposure and  
210 physiological TOR modulation (38-41), we examined this potential connection  
211 genetically. Repressible *tetO* was used to control expression of *C. albicans TOR1* or of

212 a hypomorphic *TOR1*<sup>Δ<sub>1-381</sub></sup> encoding a protein lacking the first 381 amino acids which  
213 form protein-protein interaction HEAT repeat domains. The effect of *TOR1* depletion on  
214 expression of *PHO84* was then examined.

215  
216 When wild type cells were transferred from overnight cultures into fresh rich medium,  
217 *PHO84* mRNA levels dropped, in accordance with the PHO regulon's response to  
218 availability of fresh Pi sources. In cells depleted of either the wild type or the N-  
219 terminally truncated *TOR1* allele, *PHO84* expression also decreased but to a  
220 significantly lesser extent (Fig S4A). Full length *TOR1* permitted greater *PHO84*  
221 expression than the *TOR1*<sup>Δ<sub>1-381</sub></sup> allele, suggesting structural perturbation of TORC1 by  
222 truncation of Tor1 affects its inhibitory as well as activating functions. Active TORC1,  
223 signaling nutritional repletion, hence contributes input to the PHO regulon to  
224 downregulate Pi starvation responses, while loss of TORC1 activity conveys a  
225 starvation signal to dampen these responses (Fig. S4A). Similarly, overexpression of  
226 Gtr1 and Gtr1-GTP blunted upregulation of secreted acid phosphatase in *pho84*<sup>-/-</sup> cells  
227 (Fig. S4B), supporting the model that in response to Pi TORC1 signaling downregulates  
228 the PHO regulon to integrate its activity with availability of other nutrients.

229  
230 **Small-molecule inhibitors of Pho84 repress TORC1 and potentiate antifungal**  
231 **activity.**

232 *S. cerevisiae* Pho84 has been characterized as a Pi transceptor signaling to PKA,  
233 through identification of point mutations and small molecules that preferentially perturb  
234 transport, signaling or both (42, 43). Direct pharmacological inhibition of *C. albicans*  
235 TORC1 with rapamycin incurs too high a cost on host immune function to be clinically  
236 useful (44). We tested whether blocking Pho84 with its known small-molecule inhibitors  
237 phosphonoformic acid (foscarnet, Fos) and phosphonoacetic acid (PAA) (42), which we  
238 showed inhibit *C. albicans* growth in dependence on the presence of their target Pho84  
239 (Fig. S5A, B), can indirectly inhibit *C. albicans* TORC1. Exposure of wild type cells to  
240 the FDA-approved antiviral foscarnet inhibited Rps6 phosphorylation (P-S6) in a dose-  
241 dependent manner (Fig. 4A), at Fos concentrations attained in human plasma during  
242 antiviral therapy (45, 46). In heterozygous cells (*pho84*<sup>-/+</sup>), whose haploinsufficiency  
243 phenotypes likely reflect decreased copies of the drug target, Pho84, P-S6 was



244 hypersensitive to Fos (Fig. 4A). In cells lacking the target Pho84, exposure to Fos did  
245 not further decrease the P-S6 signal (Fig. 4A). Pho84 inhibition with small molecules  
246 also recapitulated the hyphal growth defect seen in cells genetically depleted of *PHO84*  
247 (Figs. 1D, 4B and S5C).

248  
249 Potentiating existing antifungals is a promising strategy (47-49). Fos at concentrations  
250 reached in plasma during antiviral therapy (45, 46), and PAA, potentiate activity of the  
251 antifungal amphotericin B, at concentrations of the latter far below those in serum or  
252 tissue during standard dosing (50) (Fig. 4C, S5D). Activity of the antifungal micafungin,  
253 belonging to the distinct drug class of echinocandins, was also potentiated (Fig. 4D).  
254 Because Pho84 is not conserved in mammals, inhibition of Pho84 offers a novel  
255 approach to fungal-specific TORC1 inhibition (Fig. 5) and to antifungal potentiation, as  
256 shown in our proof-of-principle experiments with PAA and Fos.

257

## 258 **Discussion**

259

260 Eukaryotic cell mass consists to 0.5-1% of phosphorus (51). But phosphorus constitutes  
261 only 0.07% of the earth's crust (51) and only ~15% of soil phosphorus is bioavailable in  
262 a soluble form (52). Fungi, like plants and bacteria, have sophisticated regulatory  
263 networks to manage Pi starvation. *S. cerevisiae* cells utilize the TORC1 and PKA  
264 pathways to ensure orderly cessation of growth when nitrogen or carbon sources  
265 become limiting (53, 54). *C. albicans* cells similarly use the TORC1 pathway for  
266 calibrated responses to distinct nitrogen sources, with modulating input from PKA  
267 according to carbon source type and concentration (9).

268

269 Our study shows that *C. albicans* TORC1 monitors not only nitrogen and carbon source-  
270 but also Pi availability (Fig.1C; 2A,E). Whether Pho84 activates TORC1 indirectly by an  
271 increased intracellular Pi content, directly in a transceptor role, or through a combination  
272 of these inputs, remains an open question. Our results establish the small GTPase Gtr1,  
273 first discovered in *S. cerevisiae* due to its mutant phenotypes' resemblance to those of  
274 Pho84 (32), as an important element linking *C. albicans* Pho84 and TORC1 (Fig. 2).  
275 How Gtr1, a subunit of the TORC1-associated vacuolar membrane-residing EGO  
276 complex (55), receives information from Pho84 remains to be determined. Possible  
277 models include an activating signal to the TORC1-activating SEACAT complex (55)

278 through a sensor of cytosolic Pi or vacuolar polyphosphate, or a physical interaction  
279 between Pho84 and the EGO complex on endosomes while Pho84 is internalized  
280 during ambient Pi abundance (56). We cannot exclude alternative explanations of our  
281 findings, e.g. a TORC1 response only to intracellular Pi concentrations, and  
282 upregulation of low-affinity Pi transporters during *GTR1* overexpression in *pho84*<sup>-/-</sup> null  
283 cells. If Gtr1 is activated by Pho84, this GTPase's role in the input to TORC1 regarding  
284 the cell's Pi state appears to be specific (Fig. 2), as there was no perturbation of TORC1  
285 activation during Pi refeeding in *rhb1*<sup>-/-</sup> cells (Fig. 2B).

286  
287 In *S. cerevisiae*, Pho84 signals to PKA as a transceptor (42, 57). A signal from Pho84 to  
288 TORC1 has not yet been described in *S. cerevisiae*. We found that in the genetic  
289 background S288C loss of Pho84 leads to rapamycin hypersensitivity and TORC1  
290 inactivation as it does in *C. albicans* (Fig. S3). Sch9 phosphorylation, like that of Rps6,  
291 is known to correspond with the TORC1 activation state (36, 58). Overexpression of  
292 constitutively active Gtr1 restores TORC1 activity in *S. cerevisiae*, as assayed by Sch9  
293 and Rps6 phosphorylation (Fig. 3, S3B). But in contrast to *C. albicans*, constitutively  
294 active Gtr1 did not suppress rapamycin hypersensitivity of *S. cerevisiae pho84* null cells,  
295 indicating differences in the connections of PHO and TORC1 signaling between these  
296 fungi. In *S. cerevisiae*, control of entry into quiescence (G0) by the Rim15 kinase is co-  
297 regulated by the PHO pathway cyclin/cyclin-dependent kinase module Pho80/Pho85, as  
298 well as by TORC1(59), suggesting multiple levels of cross-talk between phosphate-  
299 specific and global nutritional signaling pathways in that organism, which remain to be  
300 explored in *C. albicans*.

301  
302 In addition to the signal from Pho84 to TORC1, we observed a signal in the opposite  
303 direction, from TORC1 to expression of *PHO84* and to the classic readout of the PHO  
304 regulon, the acid phosphatase (27) (Fig. S4A), though clearly input from TORC1  
305 contributes to only a fraction of the PHO regulon responses. TORC1 is well known to  
306 regulate proteins required for acquisition of other nutrients like amino acids and  
307 ammonium in *S. cerevisiae* (60, 61). TORC1 input to the PHO regulon may fine-tune the  
308 investment of energy and nutrients on Pi acquisition to match the overall state of the cell.  
309 In *S. cerevisiae*, transcriptional regulation favoring Pi acquisition is achieved through the  
310 transcription factor Pho4 (31). A *C. albicans* homolog of Pho4, required for stress

311 resistance (62, 63) and commensalism in a murine model (63), was recently shown to  
312 control *C. albicans* *PHO84* expression (62). How *C. albicans* Pho4 may be co-regulated  
313 by TORC1 remains to be determined.

314  
315 While TORC1 monitors nutrient availability in mammals as in fungi, its relationship with  
316 the PHO regulon may have diverged in these phyla. In fungi, H<sup>+</sup>-Pi symport is the major  
317 form of Pi import, since the steep Pi concentration gradient at the plasma membrane  
318 imposes a high energetic demand on transport, met by the electrochemical proton  
319 gradient generated by the P-type H<sup>+</sup> ATPase (52). In animals, Na<sup>+</sup>-Pi pumps  
320 predominate (64). Humans largely consume Pi together with amino acids in food  
321 consisting of other eukaryotes and their products, so that Pi starvation tends to occur  
322 during starvation for protein (65). In contrast, Pi and nitrogen sources must be acquired  
323 independently by unicellular organisms, so the connection we discovered between the  
324 fungal H<sup>+</sup>-Pi symporter and the TORC1 pathway appears physiologically plausible.

325  
326 We found that TORC1 is indirectly repressed during Pho84 inhibition with small  
327 molecules (Fig. 4, S5). Since TORC1 components are conserved between fungi and  
328 humans while Pho84 has no human homologs, this result provides an option for indirect,  
329 fungal-specific TORC1 inhibition not previously explored in the search for new  
330 antifungals. While TORC1 is only partially inhibited in this manner, other fungal-specific  
331 indirect TORC1 activators may provide synergistic targets. More immediately, Pho84  
332 inhibitors potentiate the antifungal effect of micafungin and of amphotericin B (Fig.  
333 4C,D), possibly permitting lower dosing of the latter, “gold-standard” broad-spectrum  
334 agent to obviate its often treatment-limiting toxicities (66). We used 2 of multiple Pho84  
335 inhibitors previously characterized (42) (Fig. 4 and S5D), and more specific, non-  
336 competitive inhibitors with more favorable therapeutic indices than Fos may be found  
337 through screening efforts. Since Pho84 homologs are highly conserved among fungi,  
338 potentiating amphotericin B activity through their inhibition may prove a viable  
339 therapeutic strategy for other fungal species less amenable to other antifungal agents.

340

## 341 **Materials and Methods**

342

343 **Strains and culture conditions.** The *C. albicans* and *S. cerevisiae* strains, plasmids  
344 and primers used are described in SI Tables 1-3. *C. albicans* strains were generated in  
345 the SN genetic background using *HIS1* and *ARG4* markers (67), as well as the *CaNAT1*  
346 selectable marker, as described in (20, 21). Two independent heterozygotes were used  
347 to derive homozygous null and reintegrant mutants of *PHO84*, as well as *tetO-TOR1*  
348 mutants. Auxotrophies were complemented so that only prototrophic strains, or strains  
349 with identical auxotrophies, were compared in an experiment. Introduced mutations  
350 were confirmed by PCR spanning the upstream and downstream homologous  
351 recombination junctions of transforming constructs, and sequencing. Experiments with  
352 defined ambient Pi concentrations were performed in YNB 0 Pi (ForMedium Ltd, Norfolk,  
353 UK) with added  $\text{KH}_2\text{PO}_4$  to stated concentrations. Other media were used as in (20).

354 **Screening transposon mutants for altered rapamycin susceptibility.** Our  
355 heterozygous mutant collection containing a mariner transposon marked with *CaNAT1*  
356 (20) was used. Mutants were replicated to a 96-well plate containing 2xYPD with 8%  
357 glucose and grown to saturation at room temperature, to minimize filamentous growth.  
358 Cells were replicated to YPD agar medium with vehicle (90% ethanol) or 20 ng/ml  
359 rapamycin. Clones showing less growth than the wild type (SC5314) were isolated as  
360 rapamycin hypersensitive. The transposon insertion site was identified by vectorette  
361 PCR as previously described (20).

362 **Growth Assays.** For cell dilutions spotted onto agar media as previously described (20),  
363 saturated overnight cultures were diluted in 5-fold steps from an  $\text{OD}_{600}$  of 0.5. For  
364 growth curves in liquid media, saturated overnight cultures in YPD were washed once in  
365 0.9% NaCl and diluted to an  $\text{OD}_{600}$  of 0.15 in 150  $\mu\text{l}$  medium in flat bottom 96-well  
366 dishes. For growth assays including those during drug exposure,  $\text{OD}_{600}$  readings were  
367 obtained every 15 min in a plate reader and standard deviations were calculated and  
368 graphed in Graphpad Prism. Growth during drug exposure was assayed in SC medium.  
369 Vehicle for Pho84 inhibitors PAA (Sigma, 284270) and Fos (Santa Cruz Biotechnology,  
370 SC-253593A) was water and for amphotericin B (Sigma, A9528), DMSO.

371 **Western Blots.** Cell harvesting, lysis and Western blotting were performed as  
372 described in (9). Antibodies are listed in SI Table 1. At least three biological replicates  
373 were obtained. For densitometry, ImageJ ([imagej.net/welcome](http://imagej.net/welcome)) software (opensource)  
374 was used to quantitate signals obtained on a KODAK Image Station 4000MM.

375 **Filamentous growth assay.** Cells were revived from frozen stocks on solid YPD

376 overnight, washed and resuspended in 0.9% NaCl to OD<sub>600</sub> 0.1. Variations between  
377 single colonies and colony density effects were minimized by spotting 3 µl cell  
378 suspension at 4 or 6 equidistant points, using a template, around the perimeter of an  
379 agar medium plate, which then were incubated and imaged as in (20). For small-  
380 molecule Pho84-inhibitor effects on filamentation, Spider and RPMI was used (TOKU-E,  
381 Cat# R8999-04), the latter with 0.22mM KH<sub>2</sub>PO<sub>4</sub> buffered to pH 7 with 50mM MOPS. At  
382 least 3 biological replicates were obtained for each condition.

383 **Acid phosphatase assays.** As adapted from (25), overnight cultures in SC were  
384 diluted to an OD<sub>600</sub> 0.05 into YNB medium buffered to pH4 with 50mM sodium citrate  
385 containing 0 or 11mM KH<sub>2</sub>PO<sub>4</sub> and grown overnight. They were washed thrice with  
386 water, and p-Nitrophenyl Phosphate (Sigma, N4645) was added to a concentration of  
387 5.62mg/ml. After 15 mins at room temperature the reaction was stopped with Na<sub>2</sub>CO<sub>3</sub>  
388 (pH=11) to a concentration of 0.3g/ml, and OD<sub>420</sub> and OD<sub>600</sub> were measured. At least 3  
389 biological replicates, with 3 technical replicates each, were obtained.

390 **Intracellular Pi assays.** Free and total Pi was measured by colorimetric molybdate  
391 assay as described (68). Briefly, cultures were washed with distilled water twice,  
392 resuspended in 500 µL 0.1% Triton X-100, and lysed by glass bead homogenization.  
393 Lysate protein content was determined using a BioRad Protein Assay kit. Free Pi was  
394 measured in unboiled lysate, then total phosphate was measured after boiling 3–30 µg  
395 of whole cell lysate for 10 min in 1 N H<sub>2</sub>SO<sub>4</sub>. At least 3 biological replicates, with 3  
396 technical replicates each, were obtained.

397 **RT-PCR expression analysis.** Cells were grown overnight in YPD medium with 5ng/ml  
398 doxycycline, diluted into YPD with 30 µg/ml doxycycline, and harvested at time 0, 2 h  
399 and 4 h. RNA was extracted with the Direct-Zol RNA miniprep kit (Zymo Research #  
400 R2051). RT-PCR procedures were performed as indicated (69).

401

## 402 **Acknowledgments**

403

404 We thank Gerald R. Fink, Erin K. O'Shea, Bin He, Charles Boone, Françoise Stutz,  
405 Kevin Struhl and Fred Winston for plasmids and *S. cerevisiae* strains; Leah Cowen,  
406 Chung-Yu Lan and Rajini Rao for *C. albicans* strains; Gerald R. Fink, Felix Lam, Valmik  
407 Vyas, Luke Whitesell and Bin He for helpful conversations; Brian M. Hoffman, Valeria C.  
408 Culotta and Amit R. Reddi for protocols; and Dennis Wykoff, Bin He, Robert Husson

409 and Paula Watnick for critical reading of the manuscript. This work was funded by NIAID  
410 R21AI096054 and R01AI095305. P.F. was supported by Science Foundation Ireland  
411 Grant 11/RFP.1/GEN/3044. M.E.C. was funded by NCI R01 CA154499.

412

## 413 References

414

- 415 1. Loewith R & Hall MN (2011) Target of rapamycin (TOR) in nutrient signaling and  
416 growth control. *Genetics* 189(4):1177-1201.
- 417 2. Cutler NS, Pan X, Heitman J, & Cardenas ME (2001) The TOR signal  
418 transduction cascade controls cellular differentiation in response to nutrients.  
419 *Molecular Biology of the Cell* 12(12):4103-4113.
- 420 3. Bastidas RJ, Heitman J, & Cardenas ME (2009) The protein kinase Tor1  
421 regulates adhesin gene expression in *Candida albicans*. *PLoS Pathogens*  
422 5(2):e1000294.
- 423 4. Homann OR, Dea J, Noble SM, & Johnson AD (2009) A phenotypic profile of the  
424 *Candida albicans* regulatory network. *PLoS Genetics* 5(12):e1000783.
- 425 5. Zacchi LF, Gomez-Raja J, & Davis DA (2010) Mds3 regulates morphogenesis in  
426 *Candida albicans* through the TOR pathway. *Molecular and Cellular Biology*  
427 30(14):3695-3710.
- 428 6. Lu Y, Su C, Wang A, & Liu H (2011) Hyphal development in *Candida albicans*  
429 requires two temporally linked changes in promoter chromatin for initiation and  
430 maintenance. *PLoS Biology* 9(7):e1001105.
- 431 7. Lu Y, Su C, & Liu H (2014) *Candida albicans* hyphal initiation and elongation.  
432 *Trends in Microbiology* 22(12):707-714.
- 433 8. Park H, *et al.* (2009) Transcriptional responses of *Candida albicans* to epithelial  
434 and endothelial cells. *Eukaryotic Cell* 8(10):1498-1510.
- 435 9. Chowdhury T & Köhler JR (2015) Ribosomal protein S6 phosphorylation is  
436 controlled by TOR and modulated by PKA in *Candida albicans*. *Molecular*  
437 *Microbiology* 98(2):384-402.
- 438 10. Pedruzzi I, *et al.* (2003) TOR and PKA signaling pathways converge on the  
439 protein kinase Rim15 to control entry into G0. *Molecular Cell* 12(6):1607-1613.
- 440 11. Zurita-Martinez SA & Cardenas ME (2005) Tor and cyclic AMP-protein kinase A:  
441 two parallel pathways regulating expression of genes required for cell growth.  
442 *Eukaryotic Cell* 4(1):63-71.
- 443 12. Binda M, *et al.* (2009) The Vam6 GEF controls TORC1 by activating the EGO  
444 complex. *Molecular Cell* 35(5):563-573.
- 445 13. Bonfils G, *et al.* (2012) Leucyl-tRNA synthetase controls TORC1 via the EGO  
446 complex. *Molecular Cell* 46(1):105-110.
- 447 14. Yamagata K, *et al.* (1994) Rheb, a growth factor- and synaptic activity-regulated  
448 gene, encodes a novel Ras-related protein. *The Journal of Biological Chemistry*  
449 269(23):16333-16339.
- 450 15. Urano J, Tabancay AP, Yang W, & Tamanoi F (2000) The *Saccharomyces*  
451 *cerevisiae* Rheb G-protein is involved in regulating canavanine resistance and  
452 arginine uptake. *The Journal of Biological Chemistry* 275(15):11198-11206.
- 453 16. Long X, Lin Y, Ortiz-Vega S, Yonezawa K, & Avruch J (2005) Rheb binds and  
454 regulates the mTOR kinase. *Current Biology* 15(8):702-713.

- 455 17. Laplante M & Sabatini DM (2012) mTOR signaling in growth control and disease.  
456 *Cell* 149(2):274-293.
- 457 18. Tsao CC, Chen YT, & Lan CY (2009) A small G protein Rhb1 and a GTPase-  
458 activating protein Tsc2 involved in nitrogen starvation-induced morphogenesis  
459 and cell wall integrity of *Candida albicans*. *Fungal Genetics and Biology*  
460 46(2):126-136.
- 461 19. Chen YT, *et al.* (2012) Rhb1 regulates the expression of secreted aspartic  
462 protease 2 through the TOR signaling pathway in *Candida albicans*. *Eukaryotic*  
463 *Cell* 11(2):168-182.
- 464 20. Shen J, Cowen LE, Griffin AM, Chan L, & Köhler JR (2008) The *Candida*  
465 *albicans* pescadillo homolog is required for normal hypha-to-yeast  
466 morphogenesis and yeast proliferation. *Proceedings of the National Academy of*  
467 *Sciences of the United States of America* 105(52):20918-20923.
- 468 21. Shen J, Guo W, & Köhler JR (2005) *CaNAT1*, a heterologous dominant  
469 selectable marker for transformation of *Candida albicans* and other pathogenic  
470 *Candida* species. *Infection and immunity* 73(2):1239-1242.
- 471 22. Pedersen BP, *et al.* (2013) Crystal structure of a eukaryotic phosphate  
472 transporter. *Nature* 496(7446):533-536.
- 473 23. Inglis DO, *et al.* (2012) The *Candida* genome database incorporates multiple  
474 *Candida* species: multispecies search and analysis tools with curated gene and  
475 protein information for *Candida albicans* and *Candida glabrata*. *Nucleic Acids*  
476 *Research* 40(Database issue):D667-674.
- 477 24. Bun-Ya M, Nishimura M, Harashima S, & Oshima Y (1991) The *PHO84* gene of  
478 *Saccharomyces cerevisiae* encodes an inorganic phosphate transporter.  
479 *Molecular and Cellular Biology* 11(6):3229-3238.
- 480 25. Wykoff DD & O'Shea EK (2001) Phosphate transport and sensing in  
481 *Saccharomyces cerevisiae*. *Genetics* 159(4):1491-1499.
- 482 26. Auesukaree C, *et al.* (2004) Intracellular phosphate serves as a signal for the  
483 regulation of the PHO pathway in *Saccharomyces cerevisiae*. *The Journal of*  
484 *Biological Chemistry* 279(17):17289-17294.
- 485 27. Thomas MR & O'Shea EK (2005) An intracellular phosphate buffer filters  
486 transient fluctuations in extracellular phosphate levels. *Proceedings of the*  
487 *National Academy of Sciences of the United States of America* 102(27):9565-  
488 9570.
- 489 28. Wykoff DD, Rizvi AH, Raser JM, Margolin B, & O'Shea EK (2007) Positive  
490 feedback regulates switching of phosphate transporters in *S. cerevisiae*.  
491 *Molecular Cell* 27(6):1005-1013.
- 492 29. Vogel K & Hinnen A (1990) The yeast phosphatase system. *Molecular*  
493 *Microbiology* 4(12):2013-2017.
- 494 30. Lee CM, Nantel A, Jiang L, Whiteway M, & Shen SH (2004) The serine/threonine  
495 protein phosphatase SIT4 modulates yeast-to-hypha morphogenesis and  
496 virulence in *Candida albicans*. *Molecular Microbiology* 51(3):691-709.
- 497 31. Lee YS, Huang K, Quiocho FA, & O'Shea EK (2008) Molecular basis of cyclin-  
498 CDK-CKI regulation by reversible binding of an inositol pyrophosphate. *Nature*  
499 *Chemical Biology* 4(1):25-32.
- 500 32. Bun-Ya M, Harashima S, & Oshima Y (1992) Putative GTP-binding protein, Gtr1,  
501 associated with the function of the Pho84 inorganic phosphate transporter in  
502 *Saccharomyces cerevisiae*. *Molecular and Cellular Biology* 12(7):2958-2966.

- 503 33. Lagerstedt JO, Reeve I, Voss JC, & Persson BL (2005) Structure and function of  
504 the GTP binding protein Gtr1 and its role in phosphate transport in  
505 *Saccharomyces cerevisiae*. *Biochemistry* 44(2):511-517.
- 506 34. Nakashima N, Noguchi E, & Nishimoto T (1999) *Saccharomyces cerevisiae*  
507 putative G protein, Gtr1p, which forms complexes with itself and a novel protein  
508 designated as Gtr2p, negatively regulates the Ran/Gsp1p G protein cycle  
509 through Gtr2p. *Genetics* 152(3):853-867.
- 510 35. Kingsbury JM, Sen ND, & Cardenas ME (2015) Branched-Chain  
511 Aminotransferases Control TORC1 Signaling in *Saccharomyces cerevisiae*.  
512 *PLoS Genetics* 11(12):e1005714.
- 513 36. Kingsbury JM, Sen ND, Maeda T, Heitman J, & Cardenas ME (2014)  
514 Endolysosomal membrane trafficking complexes drive nutrient-dependent  
515 TORC1 signaling to control cell growth in *Saccharomyces cerevisiae*. *Genetics*  
516 196(4):1077-1089.
- 517 37. Giaever G, *et al.* (2002) Functional profiling of the *Saccharomyces cerevisiae*  
518 genome. *Nature* 418(6896):387-391.
- 519 38. Cox KH, Kulkarni A, Tate JJ, & Cooper TG (2004) Gln3 phosphorylation and  
520 intracellular localization in nutrient limitation and starvation differ from those  
521 generated by rapamycin inhibition of Tor1/2 in *Saccharomyces cerevisiae*. *The*  
522 *Journal of Biological Chemistry* 279(11):10270-10278.
- 523 39. Puria R, Zurita-Martinez SA, & Cardenas ME (2008) Nuclear translocation of  
524 Gln3 in response to nutrient signals requires Golgi-to-endosome trafficking in  
525 *Saccharomyces cerevisiae*. *Proceedings of the National Academy of Sciences of*  
526 *the United States of America* 105(20):7194-7199.
- 527 40. Puria R & Cardenas ME (2008) Rapamycin bypasses vesicle-mediated signaling  
528 events to activate Gln3 in *Saccharomyces cerevisiae*. *Communicative &*  
529 *Integrative Biology* 1(1):23-25.
- 530 41. Kingsbury JM & Cardenas ME (2016) Vesicular Trafficking Systems Impact  
531 TORC1-Controlled Transcriptional Programs in *Saccharomyces cerevisiae*. *G3*  
532 6(3):641-652.
- 533 42. Popova Y, Thayumanavan P, Lonati E, Agrochao M, & Thevelein JM (2010)  
534 Transport and signaling through the phosphate-binding site of the yeast Pho84  
535 phosphate transceptor. *Proceedings of the National Academy of Sciences of the*  
536 *United States of America* 107(7):2890-2895.
- 537 43. Samyn DR, *et al.* (2012) Mutational analysis of putative phosphate- and proton-  
538 binding sites in the *Saccharomyces cerevisiae* Pho84 phosphate:H(+)  
539 transceptor and its effect on signalling to the PKA and PHO pathways. *The*  
540 *Biochemical Journal* 445(3):413-422.
- 541 44. Cruz MC, *et al.* (2001) Rapamycin and less immunosuppressive analogs are  
542 toxic to *Candida albicans* and *Cryptococcus neoformans* via FKBP12-dependent  
543 inhibition of TOR. *Antimicrobial Agents and Chemotherapy* 45(11):3162-3170.
- 544 45. Chrisp P & Clissold SP (1991) Foscarnet. A review of its antiviral activity,  
545 pharmacokinetic properties and therapeutic use in immunocompromised patients  
546 with cytomegalovirus retinitis. *Drugs* 41(1):104-129.
- 547 46. Minor JR & Baltz JK (1991) Foscarnet sodium. *DICP : the annals of*  
548 *pharmacotherapy* 25(1):41-47.
- 549 47. Robbins N, *et al.* (2015) An Antifungal Combination Matrix Identifies a Rich Pool  
550 of Adjuvant Molecules that Enhance Drug Activity against Diverse Fungal  
551 Pathogens. *Cell Rep* 13(7):1481-1492.



- 552 48. Butts A, *et al.* (2013) A repurposing approach identifies off-patent drugs with  
553 fungicidal cryptococcal activity, a common structural chemotype, and  
554 pharmacological properties relevant to the treatment of cryptococcosis.  
555 *Eukaryotic Cell* 12(2):278-287.
- 556 49. Butts A, Palmer GE, & Rogers PD (2016) Antifungal adjuvants: Preserving and  
557 extending the antifungal arsenal. *Virulence*:1-13.
- 558 50. Hamill RJ (2013) Amphotericin B formulations: a comparative review of efficacy  
559 and toxicity. *Drugs* 73(9):919-934.
- 560 51. Audesirk T, Audesirk G, & Byers BE (1999) *Biology: Life on Earth* (Prentice-Hall)  
561 5th Ed.
- 562 52. Johri AK, *et al.* (2015) Fungal association and utilization of phosphate by plants:  
563 success, limitations, and future prospects. *Frontiers in Microbiology* 6:984.
- 564 53. Barbet NC, *et al.* (1996) TOR controls translation initiation and early G1  
565 progression in yeast. *Molecular Biology of the Cell* 7(1):25-42.
- 566 54. Broach JR (2012) Nutritional control of growth and development in yeast.  
567 *Genetics* 192(1):73-105.
- 568 55. Panchaud N, Peli-Gulli MP, & De Virgilio C (2013) SEACing the GAP that  
569 nEGOCiates TORC1 activation: evolutionary conservation of Rag GTPase  
570 regulation. *Cell Cycle* 12(18):2948-2952.
- 571 56. Lagerstedt JO, *et al.* (2002) Mutagenic and functional analysis of the C-terminus  
572 of *Saccharomyces cerevisiae* Pho84 phosphate transporter. *FEBS Letters* 526(1-  
573 3):31-37.
- 574 57. Giots F, Donaton MC, & Thevelein JM (2003) Inorganic phosphate is sensed by  
575 specific phosphate carriers and acts in concert with glucose as a nutrient signal  
576 for activation of the protein kinase A pathway in the yeast *Saccharomyces*  
577 *cerevisiae*. *Molecular Microbiology* 47(4):1163-1181.
- 578 58. Urban J, *et al.* (2007) Sch9 is a major target of TORC1 in *Saccharomyces*  
579 *cerevisiae*. *Molecular Cell* 26(5):663-674.
- 580 59. Wanke V, Pedruzzi I, Cameroni E, Dubouloz F, & De Virgilio C (2005) Regulation  
581 of G0 entry by the Pho80-Pho85 cyclin-CDK complex. *The EMBO Journal*  
582 24(24):4271-4278.
- 583 60. Cardenas ME, Cutler NS, Lorenz MC, Di Como CJ, & Heitman J (1999) The TOR  
584 signaling cascade regulates gene expression in response to nutrients. *Genes &*  
585 *Development* 13(24):3271-3279.
- 586 61. Crespo JL, Powers T, Fowler B, & Hall MN (2002) The TOR-controlled  
587 transcription activators *GLN3*, *RTG1*, and *RTG3* are regulated in response to  
588 intracellular levels of glutamine. *Proceedings of the National Academy of*  
589 *Sciences of the United States of America* 99(10):6784-6789.
- 590 62. Ikeh MA, *et al.* (2016) Pho4 mediates phosphate acquisition in *Candida albicans*  
591 and is vital for stress resistance and metal homeostasis. *Molecular Biology of the*  
592 *Cell*. 27(17):2784-801.
- 593 63. Urrialde V, Prieto D, Pla J, & Alonso-Monge R (2016) The *Candida albicans*  
594 Pho4 Transcription Factor Mediates Susceptibility to Stress and Influences  
595 Fitness in a Mouse Commensalism Model. *Frontiers in Microbiology* 7:1062.
- 596 64. Escoubet B, Djabali K, & Amiel C (1989) Adaptation to Pi deprivation of cell Na-  
597 dependent Pi uptake: a widespread process. *The American Journal of*  
598 *Physiology* 256(2 Pt 1):C322-328.
- 599 65. Hearing SD (2004) Refeeding syndrome. *BMJ* 328(7445):908-909.
- 600 66. Mora-Duarte J, *et al.* (2002) Comparison of caspofungin and amphotericin B for  
601 invasive candidiasis. *N Engl J Med* 347(25):2020-2029.

- 602 67. Noble SM & Johnson AD (2005) Strains and strategies for large-scale gene  
 603 deletion studies of the diploid human fungal pathogen *Candida albicans*.  
 604 *Eukaryotic Cell* 4(2):298-309.  
 605 68. McNaughton RL, et al. (2010) Probing in vivo Mn<sup>2+</sup> speciation and oxidative  
 606 stress resistance in yeast cells with electron-nuclear double resonance  
 607 spectroscopy. *Proceedings of the National Academy of Sciences of the United*  
 608 *States of America* 107(35):15335-15339.  
 609 69. Singh AK, et al. (2016) Investigating essential gene function in *Mycobacterium*  
 610 *tuberculosis* using an efficient CRISPR interference system. *Nucleic Acids*  
 611 *Research* 44(18):e143.  
 612

613 **Figure Legends**

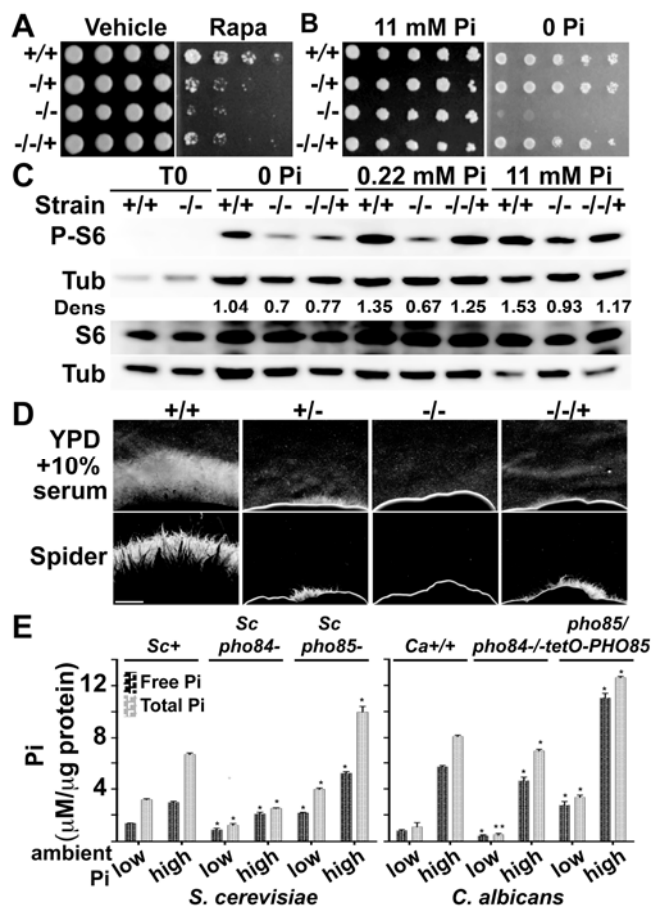

614  
 615 **Fig. 1. *C. albicans* PHO84 is required for rapamycin tolerance, growth during Pi**  
 616 **starvation, normal TORC1 activity and filamentation, and Pi homeostasis. A.** Cell  
 617 dilutions of wild type (wt) and a mutant series in *PHO84* pinned onto YPD with vehicle  
 618 or 12 ng/ml rapamycin. *PHO84*<sup>+/+</sup>, JKC915. *pho84*<sup>+/+</sup>, JKC1583. *pho84*<sup>-/-</sup>, JKC1450.  
 619 *pho84*<sup>-/-/+</sup>, JKC1588. **B.** Cells as in A pinned onto YNB with 0 or 11 mM Pi. **C.** Separate  
 620 Western blots of the same samples for P-S6, total Rps6 and tubulin of wt (+/+, JKC915),  
 621 *pho84* null (-/-, JKC1450), and *PHO84* reintegrant (-/-/+, JKC1588) cells grown in YNB  
 622 with 0, 0.22 mM or 11 mM KH<sub>2</sub>PO<sub>4</sub> for 90 min. Dens: densitometry of P-S6 vs. tubulin

623 signal intensity. **D.** Strains as in (A) spotted at equidistant points around agar plates and  
 624 spot edges imaged. Compare SI Fig. 2A. Bar 1mm. **E.** *S. cerevisiae* and *C. albicans*  
 625 wild type and *pho84* null cells grown in SC medium with 0.22 mM (low Pi) or 11 mM Pi  
 626 (high Pi) overnight, assayed for free and total Pi. *pho85* null cells as controls which  
 627 hyperaccumulate Pi. *Sc+* (*S. cerevisiae* *PHO84 PHO85*), BY4741. *Scpho84-*, EY2960  
 628 and *Scpho85-*, from (37). *Ca+/+* (*C. albicans* *PHO84/PHO84 PHO85/PHO85*), JKC915.  
 629 *Capho84-/-*, JKC1450. *Capho85-/-*, CaLC1919, grown in 20  $\mu$ g/ml doxycycline overnight.  
 630 \* $p < 0.01$ ; \*\* $p < 0.05$ . A-E represent at least 3 biological replicates; error bars SD of 3  
 631 technical replicates.

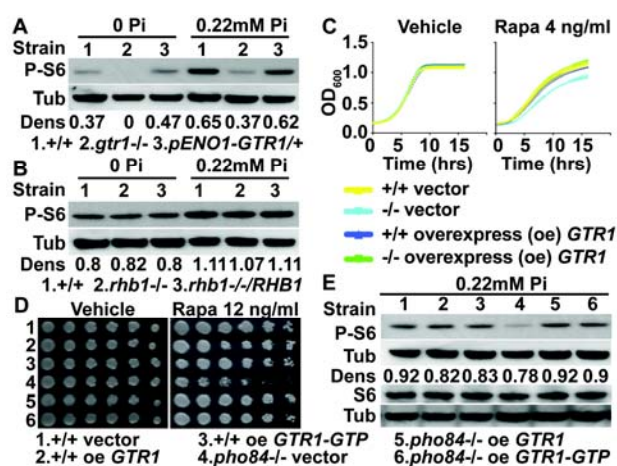

632 **Fig. 2. Gtr1 links Pho84 to TOR in *C. albicans*.** **A.** Western blot of wild type (wt)  
 633 (SC5314), *gtr1*<sup>-/-</sup> (YGM367) and *pENO1-GTR/GTR1* (YGM365) cells, grown in YNB  
 634 with 0 and 0.22 mM KH<sub>2</sub>PO<sub>4</sub> for 90 min. Dens: densitometric ratio of P-S6 vs. tubulin  
 635 signal intensity. **B.** Western blot of wt (SC5314), *rhb1*<sup>-/-</sup> (CCT-D1) and *rhb1*<sup>-/-</sup>/*pADH1-*  
 636 *RHB1* (CCT-OE1) cells, grown in YNB with 0 or 0.22 mM KH<sub>2</sub>PO<sub>4</sub> for 90 min. **C.** Growth  
 637 in YPD with 4 ng/ml rapamycin or vehicle. OD<sub>600</sub> monitored every 15 minutes. Yellow:  
 638 wt with vector (JKC1594); blue: wt overexpressing *GTR1* (JKC1596); cyan: *pho84*<sup>-/-</sup>  
 639 with vector (JKC1598); green: *pho84*<sup>-/-</sup> overexpressing *GTR1* (JKC1600). **D.** Cell  
 640 dilutions pinned onto YPD with vehicle or 12 ng/ml rapamycin. Strains, (1) wt with vector  
 641 (JKC1594), (2) wt overexpressing *GTR1* (JKC1596), (3) wt overexpressing *GTR1-GTP*  
 642 (JKC1619), (4) *pho84*<sup>-/-</sup> with vector (JKC1598), (5) *pho84*<sup>-/-</sup> overexpressing *GTR1*  
 643 (JKC1600) and (6) *pho84*<sup>-/-</sup> overexpressing *GTR1-GTP* (JKC1616). **E.** Western blot of  
 644 cells grown in YNB with 0.22 mM KH<sub>2</sub>PO<sub>4</sub> for 90 min. Strains 1-6 as in (D). A-E  
 645 represent at least 3 biological replicates.  
 646

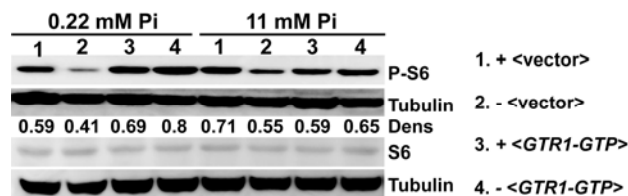

647

648 **Fig. 3. A connection between Pho84 and TORC1 is conserved in *S. cerevisiae*.**

649 Western blot of (1) *PHO84* with vector (Y1597), (2) *pho84* with vector (Y1599), (3)  
650 *PHO84* with *GTR1-GTP GTR2-GDP* (Y1596) and (4) *pho84* with *GTR1-GTP GTR2-*  
651 *GDP* (Y1604) cells, grown in SC (-His-Ura) containing 0.22 mM and 11 mM  $\text{KH}_2\text{PO}_4$  for  
652 90 min, probed for P-S6, S6 and tubulin. Representative of 3 biological replicates.

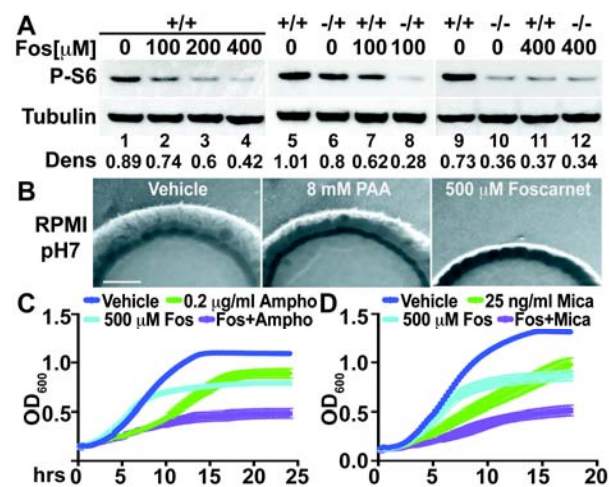

653

654 **Fig. 4. Small-molecule inhibition of Pho84 represses TORC1 and filamentous**  
655 **growth, and potentiates amphotericin B and micafungin. A.** Western blot of wild

656 type (wt) (SC5314) cells with (1) vehicle, (2) 100 μM foscarnet (Fos), (3) 200 μM Fos,  
657 (4) 400 μM Fos, and strains (5, 7, 9, 11) *PHO84*<sup>+/+</sup> (JKC915), (6, 8) *pho84*<sup>+/+</sup>  
658 (JKC1583) and (10, 12) *pho84*<sup>-/-</sup> (JKC1450), grown in standard SC (7.3 mM Pi) for 60  
659 min, probed for P-S6 and tubulin. **B.** Wt (SC5314) spotted at equidistant points around  
660 RPMI agar (0.22 mM  $\text{KH}_2\text{PO}_4$ , pH7) containing vehicle, 8mM PAA, or 500 μM Fos,  
661 grown at 37°C, and spot edges imaged. Compare SI Fig. 2A. Bar 1mm. **C.** Wt (SC5314)  
662 exposed to vehicle, 500 μM Fos, 0.2 μg/ml amphotericin B, and amphotericin B plus  
663 Fos; OD<sub>600</sub> in SC with 0.5 mM  $\text{KH}_2\text{PO}_4$  at 30°C monitored every 15 minutes. **D.** Wt  
664 (SC5314) exposed to vehicle, 500 μM Fos, 25 ng/ml micafungin, and micafungin plus  
665 Fos; OD<sub>600</sub> in SC with 0.5 mM  $\text{KH}_2\text{PO}_4$  at 30°C monitored every 15 minutes.

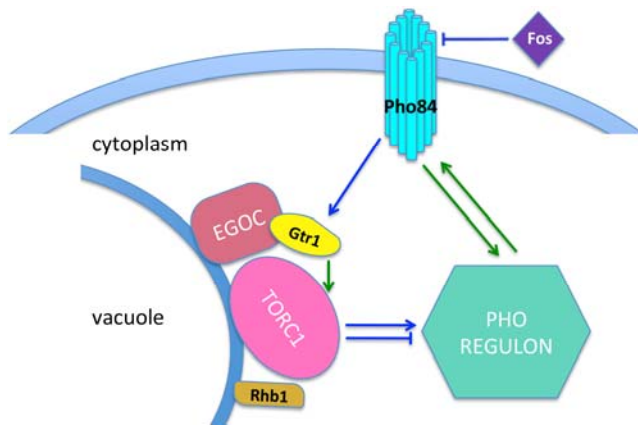

666

667 **Fig. 5. Pho84 activates TORC1 via Gtr1, and TORC1 in turn modulates the PHO**  
668 **regulon. Foscarnet inhibits Pho84 and thereby indirectly blocks TORC1 activity.**

669 Signaling events with known molecular mechanisms in *S. cerevisiae* are shown as  
670 green lines. Blue lines represent predicted activities based on our findings.

671
